# Supplementary material for: Increased cardiac index due to terbutaline treatment aggravates capillary-alveolar macromolecular leakage in oleic acid lung injury in dogs
Source: Springer Nature journal article supplement (doi:10.1186/cc8137), 2009-10-21
Supplement: Additional file 1 [file cc8137-s1.doc]

**Additional data file 1**

The lavaged lung segment volume (*Vt,n*) at cycle *n* (*n,* lavage cycle number) is calculated from the alveolar 125I-albumin concentration :

where *Cr,n* is the activity of 125I-albumin per ml of retrieved BAL fluid, *Qn*; the amount of 125I-albumin added to the lung segment (*Qa,n*) minus the amount removed due to sampling of the BAL fluid (*Qs,n*) :

In order to simplify the mathematical formalization of the two-compartment model (blood and alveoli), a constant blood FITC-D70 concentration is assumed. The mass exchanges of FITC-D70 between the blood and alveolar compartments depend on two transport rate coefficients. The first, named *KAB*, is the transport rate coefficient (min-1) for FITC-D70 from blood to alveoli; the second, named *KBA*, is the transport rate coefficient (min-1) for FITC-D70 from alveoli to blood.

Since the volume of the BAL fluid samples (*VFS*) was as large as 10% of the lavaged lung volume and was replaced by fresh lavage fluid, the FITC-D70 concentration gradient from blood to alveoli was maintained. The return FITC-D70 mass flow from alveoli to blood (dependent upon the transport rate coefficient *KBA* in the two-compartment model) was therefore considered negligible. The removal of FITC-D70 from the alveolar compartment due to the BAL fluid sampling process (including its replacement with fresh fluid) was calculated for each BAL cycle as dependent upon a fluid sampling transport rate coefficient (min-1), named (*KFS*), such as :

where *T* is the cycle duration.

The mass balance of the system is given by :

*d* [*FITC-D70*]*Blood*

= 0

*dt*

*d* [*FITC-D70*]*Alveoli*

= *KAB (t)* [*FITC-D70*]*Blood* – (*KFS (t)* + *KBA (t)* [*FITC-D70*]*Alveoli*)

*dt*

For each BAL cycle of rank *i*, we define a time interval, named *Ti = ti+1 - ti*, where *ti+1* is the beginning of the cycle *i+1*. We assume that *KFS* and *KBA*are constant within *Ti*. In order to simplify the solution of the above system of differential equations, we introduce: *X(t) =* [*FITC-D70*]*alveoli* at time *t* and *Y(t) =* [*FITC-D70*]*blood*, that we assume constant during the experiment. The solution is :

where *KFS,i* is the removal transport rate coefficient of FITC-D70 from the alveolar compartment due to the BAL fluid sampling process during the time interval *Ti* ; *KAB,i* is the transport rate coefficient for FITC-D70 from blood to alveoli during the time interval *Ti*. These two coefficients are assumed to be constant during the time interval *Ti*. The unknown *KABi* is estimated from the above solution by :

*KABi*is expressed as the transport rate coefficient (min-1) for FITC-D70 from blood to alveoli.
